# Supplementary material for: Using Geovisualization Tools to Examine Attitudes towards Alcohol Exposure in Urban Environments: A Pilot Study in Madrid, Spain
Source: MDPI journal article supplement (doi:10.3390/ijerph19159192), 2022-07-27
Supplement: s1 [file s1]

## Supplementary Material- survey<sup>i</sup>

### A. Please look at the scenes below and answer the following questions:

**A1. Rate on a scale of 1 (least) to 10 (most) the presence of alcohol-related elements in each of the scenes.**

|                |   |   |   |   |   |   |   |   |   |    |
|----------------|---|---|---|---|---|---|---|---|---|----|
| <b>Scene 1</b> | 1 | 2 | 3 | 4 | 5 | 6 | 7 | 8 | 9 | 10 |
| <b>Scene 2</b> | 1 | 2 | 3 | 4 | 5 | 6 | 7 | 8 | 9 | 10 |
| <b>Scene 3</b> | 1 | 2 | 3 | 4 | 5 | 6 | 7 | 8 | 9 | 10 |

**A2. Rate on a scale of 1 (least) to 3 (most) the resemblance between the scenes and the reality of Madrid, specifically Lavapiés Square, in terms of the presence of alcohol-related elements.**

|                |   |   |   |
|----------------|---|---|---|
| <b>Scene 1</b> | 1 | 2 | 3 |
| <b>Scene 2</b> | 1 | 2 | 3 |
| <b>Scene 3</b> | 1 | 2 | 3 |

**A3. Rate on a scale of 1 (least comfortable) to 10 (most comfortable) how you would feel in each of the scenes.**

|                |   |   |   |   |   |   |   |   |   |    |
|----------------|---|---|---|---|---|---|---|---|---|----|
| <b>Scene 1</b> | 1 | 2 | 3 | 4 | 5 | 6 | 7 | 8 | 9 | 10 |
| <b>Scene 2</b> | 1 | 2 | 3 | 4 | 5 | 6 | 7 | 8 | 9 | 10 |
| <b>Scene 3</b> | 1 | 2 | 3 | 4 | 5 | 6 | 7 | 8 | 9 | 10 |

**A4. Would you accept being in these scenes? (1=least acceptance, 10=greatest acceptance).**

|                |   |   |   |   |   |   |   |   |   |    |
|----------------|---|---|---|---|---|---|---|---|---|----|
| <b>Scene 1</b> | 1 | 2 | 3 | 4 | 5 | 6 | 7 | 8 | 9 | 10 |
| <b>Scene 2</b> | 1 | 2 | 3 | 4 | 5 | 6 | 7 | 8 | 9 | 10 |
| <b>Scene 3</b> | 1 | 2 | 3 | 4 | 5 | 6 | 7 | 8 | 9 | 10 |

**A5. In the presence of children, would you accept being in these scenes? (1=least acceptance, 10=greatest acceptance).**

|                |   |   |   |   |   |   |   |   |   |    |
|----------------|---|---|---|---|---|---|---|---|---|----|
| <b>Scene 1</b> | 1 | 2 | 3 | 4 | 5 | 6 | 7 | 8 | 9 | 10 |
| <b>Scene 2</b> | 1 | 2 | 3 | 4 | 5 | 6 | 7 | 8 | 9 | 10 |
| <b>Scene 3</b> | 1 | 2 | 3 | 4 | 5 | 6 | 7 | 8 | 9 | 10 |

**B. To conclude, please fill out this section on sociodemographic information.**

|           |                 |          |
|-----------|-----------------|----------|
| <b>B1</b> | <b>Your age</b> |          |
|           | 1               | Under 18 |
|           | 2               | 18-30    |
|           | 3               | 31-60    |
|           | 4               | Over 60  |

|           |                 |
|-----------|-----------------|
| <b>B2</b> | <b>Your sex</b> |
|           | Man             |
|           | Woman           |

|           |                               |                         |
|-----------|-------------------------------|-------------------------|
| <b>B3</b> | <b>Do you live in Madrid?</b> |                         |
|           | 1                             | Yes ► Go to question C4 |
|           | 2                             | No ► Go to question C5  |

|           |                                                    |  |
|-----------|----------------------------------------------------|--|
| <b>B4</b> | <b>In what neighborhood of Madrid do you live?</b> |  |
|           |                                                    |  |

|           |                                                                 |  |
|-----------|-----------------------------------------------------------------|--|
| <b>B5</b> | <b>If you do not live in Madrid, in which city do you live?</b> |  |
|           |                                                                 |  |

| <b>B6</b> |   | <b>Number of children you have</b> |
|-----------|---|------------------------------------|
|           | 1 | None                               |
|           | 2 | 1                                  |
|           | 3 | 2                                  |
|           | 4 | 3 or more                          |

| <b>B7</b> |    | <b>What is your maximum level of completed studies? (Mark only one option)</b>  |
|-----------|----|---------------------------------------------------------------------------------|
|           | 1  | You know how to read and to write but you attended school for less than 5 years |
|           | 2  | Unofficial Primary Education                                                    |
|           | 3  | Official Certificate of Primary Education                                       |
|           | 4  | Secondary Education                                                             |
|           | 5  | Professional Secondary Education                                                |
|           | 6  | Professional basic tertiary education                                           |
|           | 7  | University Bachelors Degree                                                     |
|           | 8  | University Honors Degree                                                        |
|           | 9  | University Masters degree                                                       |
|           | 10 | PhD                                                                             |
|           | 11 | Other (please specify)                                                          |

---

<sup>i</sup> The original questionnaire was written and sent out in Spanish. This is a translated version for its publication in International Journal of Environmental Research and Public Health
